# Supplementary material
Source: publisher figshare collection journal article supplement (https://acs.figshare.com/ndownloader/files/3757342)
Supplement: Supplementary file 1 [file 3757342]

## Supporting Information

### Methacrylate Polymer Scaffolding Enhances the Stability of Suspended Lipid Bilayers for Ion Channel Recordings and Biosensor Development

Leonard K. Bright,<sup>1</sup> Christopher A. Baker,<sup>1</sup> Robert Bränström,<sup>4</sup> S. Scott Saavedra<sup>1,2</sup> and Craig A. Aspinwall<sup>1,2,3\*</sup>

(1) Department of Chemistry and Biochemistry; (2) BIO5 Institute; (3) Department of Biomedical Engineering; University of Arizona, Tucson, AZ 85721 (4) Endocrine and Sarcoma Surgery Unit, Department of Molecular Medicine and Surgery, Karolinska Institutet, Karolinska University Hospital, SE-171 76 Stockholm, Sweden

\*Address correspondence to:

Dr. Craig A. Aspinwall  
Department of Chemistry and Biochemistry  
University of Arizona  
1306 E. University Blvd  
Tucson, AZ 85721  
Ph 520-621-6338  
Fx 520-621-8407  
E-mail: [aspinwal@email.arizona.edu](mailto:aspinwal@email.arizona.edu)

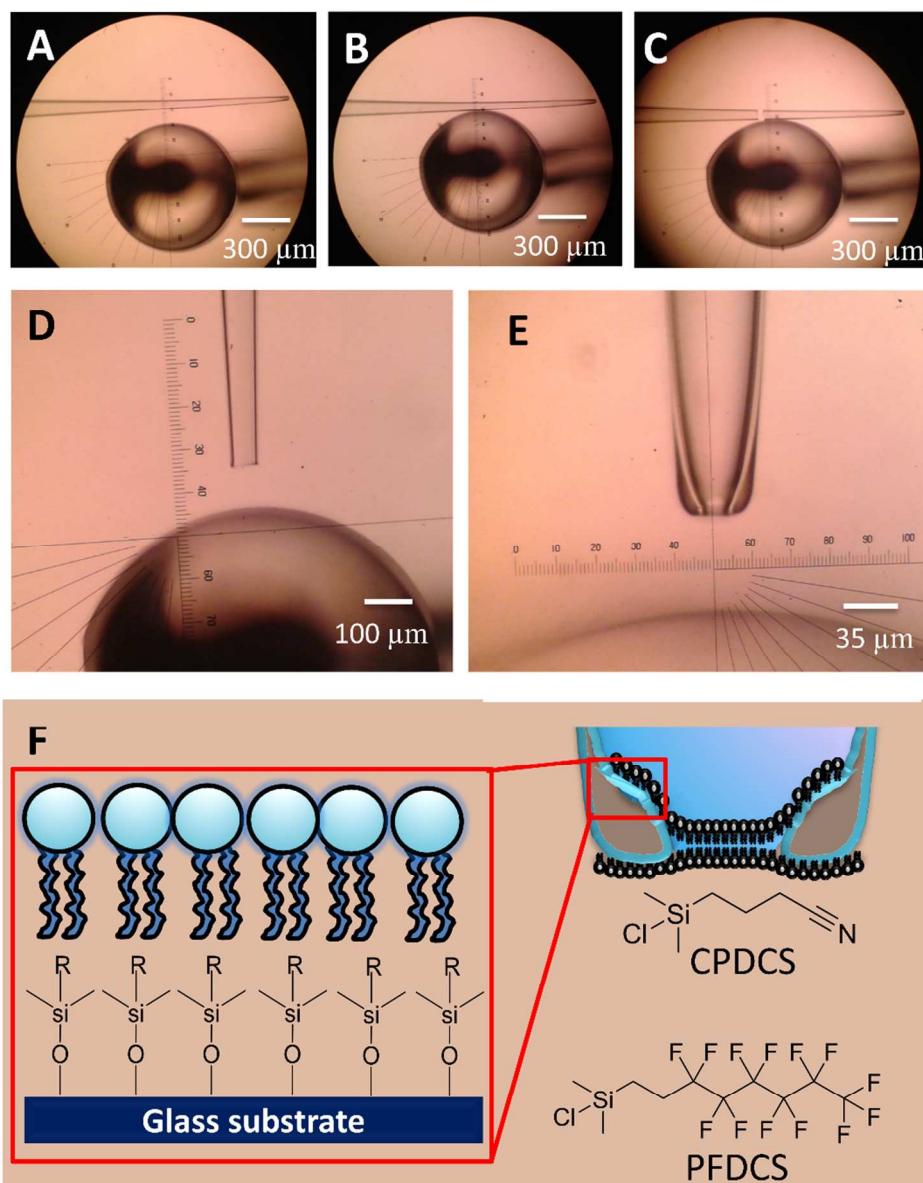

**Figure S 1. Fabrication of pipette microapertures for suspended lipid bilayer (BLM) formation.** **A.** Glass pipette is aligned orthogonal to the glass bead. **B.** The pipette is allowed to barely touch glass bead. **C.** Mild heating of glass bead fuses glass to pipette. **D.** Fused opening of glass pipette is aligned vertically with the glass bead to facilitate fire polishing. **E.** Pipette is fire polished to desired diameter. **F.** Schematic of CPDCS- or PFDCS-modified glass pipette aperture with lower surface energy that allows a lipid monolayer to deposit on opposite sides of aperture to form BLM.

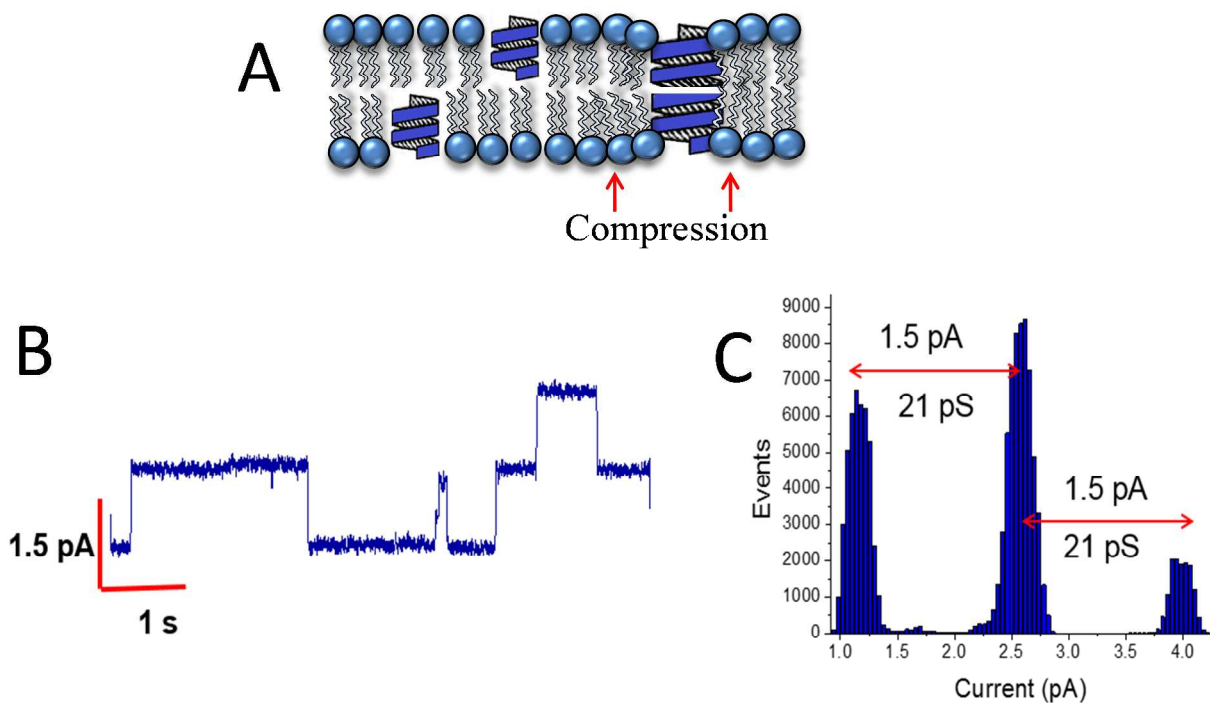

**Figure S 2. Gramicidin A activity in conventional (unpolymerized) suspended lipid bilayers.** **A.** Bilayer compression is required to facilitate gramicidin pore formation (modified from Andersen et al.).<sup>1</sup> **B.** A representative trace of gramicidin ion current in a conventional BLM with an applied potential of 70 mV shows characteristic gating activity. **C.** The all-points histogram of the current trace shown in part B shows quantized conductance states separated by ca. 21 pS, which is a characteristic of gramicidin ion channels in conventional BLMs.

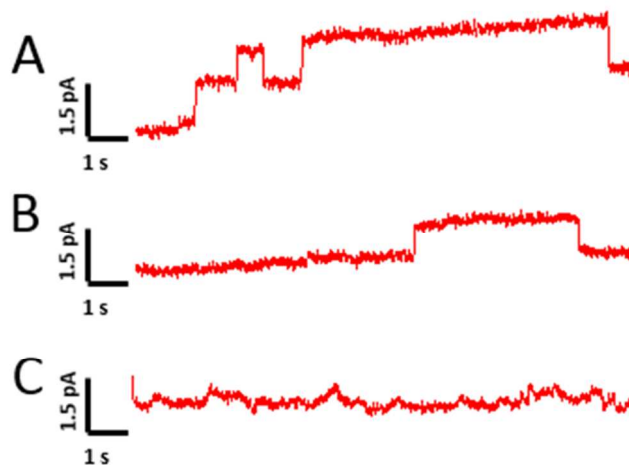

**Figure S 3. Gramicidin A activity in pre-formed PSS-BLMs.** **A.** Ion channel maintains activity after 5 h of reconstitution with slight drift in baseline and peak current. **B.** Activity of ion channel decreases after 7 h and **C.** loss of channel activity after 9 h of reconstitution.

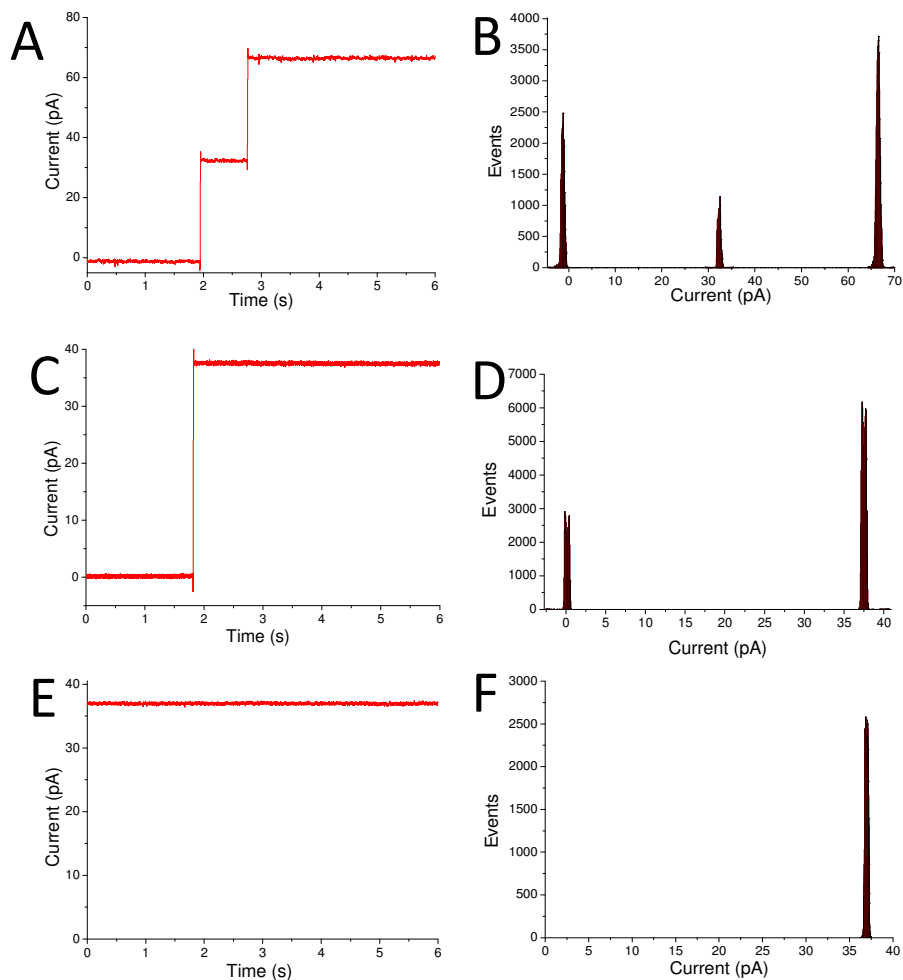

**Figure S 4.** *Single ion channel recordings and all-points histograms of  $\alpha$ -HL in BLMs suspended on PFDCS-modified pipette apertures. A,B.* Single channel recording and all-points histograms reveal multiple insertions of  $\alpha$ -HL in a conventional BLM with characteristic conductance of ca. 1 nS per channel. **C, D** A single  $\alpha$ -HL channel was allowed to insert into a MA-BLM, where the characteristic conductance of ca. 1 nS was observed. **E, F.** Following 10 min UV-irradiation of the BLM shown in E to form a PSS-BLM,  $\alpha$ -HL activity was unaffected by extended cross-linking within the membrane. All recordings were made at a holding potential of 40 mV.

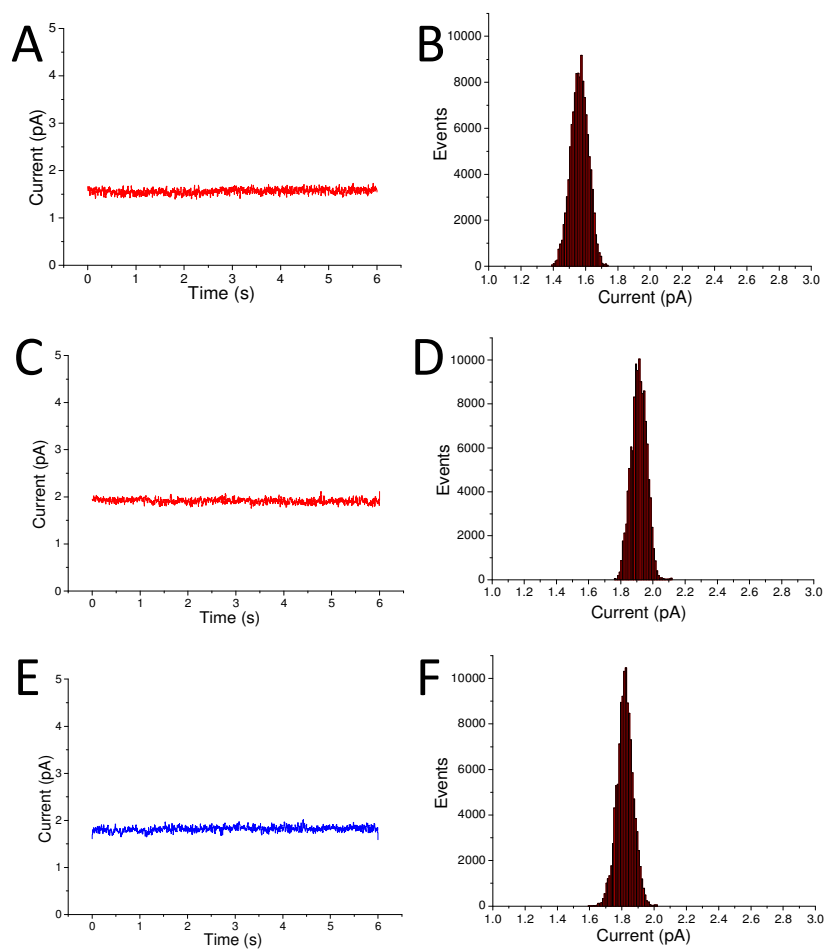

**Figure S 5. Noise characteristics of conventional BLMs, MA-BLMs and PSS-BLMs.** A, C, E. Baseline recording and B, D, F all-points histograms reveal stable baseline and reproducible rms noise values for each membrane configuration. PSS-BLMs were formed via 10 min UV-irradiation of the BLM. All recordings were made at a holding potential of 40 mV.

## References

- (1) Andersen, O. S.; Koeppe, R. E.: Bilayer thickness and membrane protein function: an energetic perspective. *Annual Review of Biophysics and Biomolecular Structure* **2007**, *36*, 107-130.
